# Supplementary material for: Asymmetric synthesis of quaternary aryl amino acid derivatives via a three-component aryne coupling reaction
Source: publisher site journal article supplement (doi:10.3762/bjoc.7.185), 2011-11-25

# Supporting Information File 2

for

## **Asymmetric synthesis of quaternary aryl amino acid derivatives via a three-component aryne coupling reaction**

Elizabeth P. Jones<sup>1</sup>, Peter Jones<sup>2</sup>, Andrew J. P. White<sup>1</sup> and Anthony G. M. Barrett<sup>\*1</sup>

Address: <sup>1</sup>Department of Chemistry, Imperial College London, London, SW7 2AZ, England and <sup>2</sup>Worldwide Medicinal Chemistry, Pfizer Limited, Ramsgate Road, Sandwich, Kent, CT13 9NJ, England

Email: Anthony G. M. Barrett<sup>\*1</sup> - [agm.barrett@imperial.ac.uk](mailto:agm.barrett@imperial.ac.uk)

\* Corresponding author

**NMR spectral data for compounds 6a–j and 7b–c.**

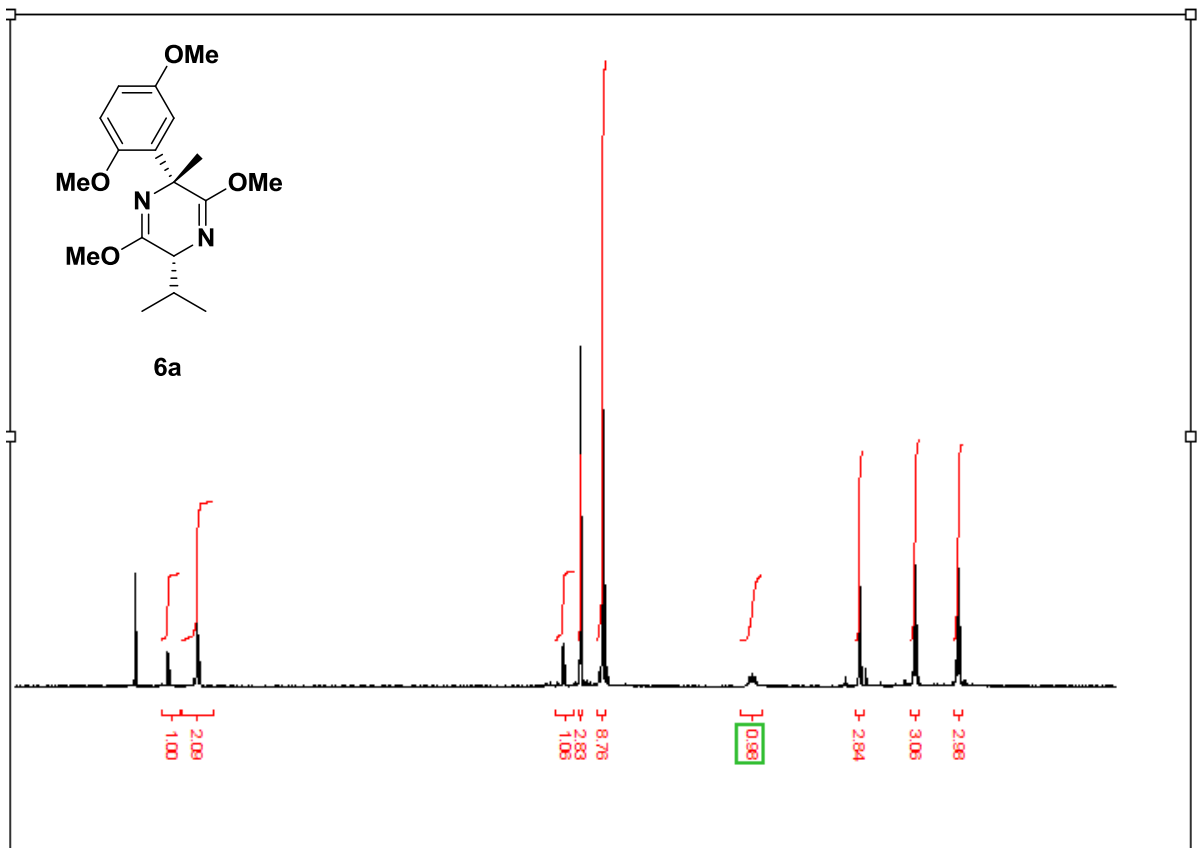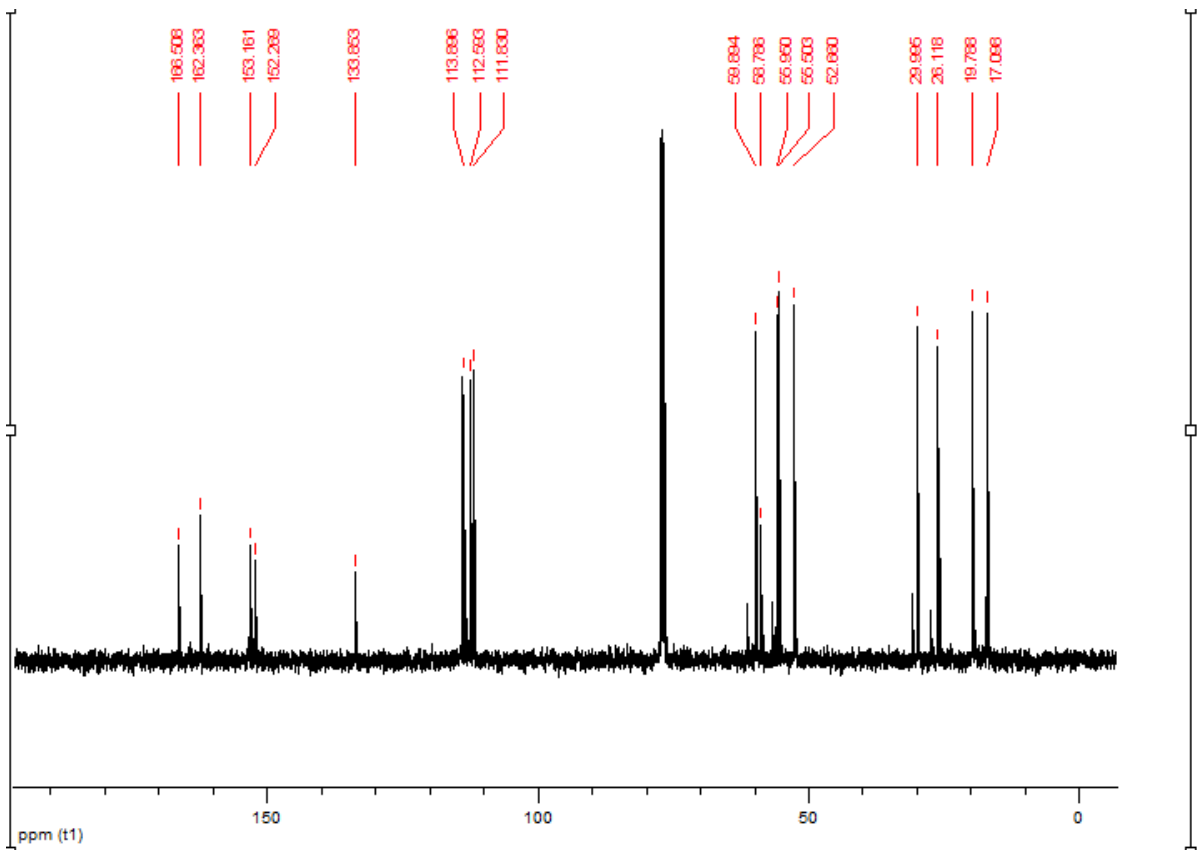

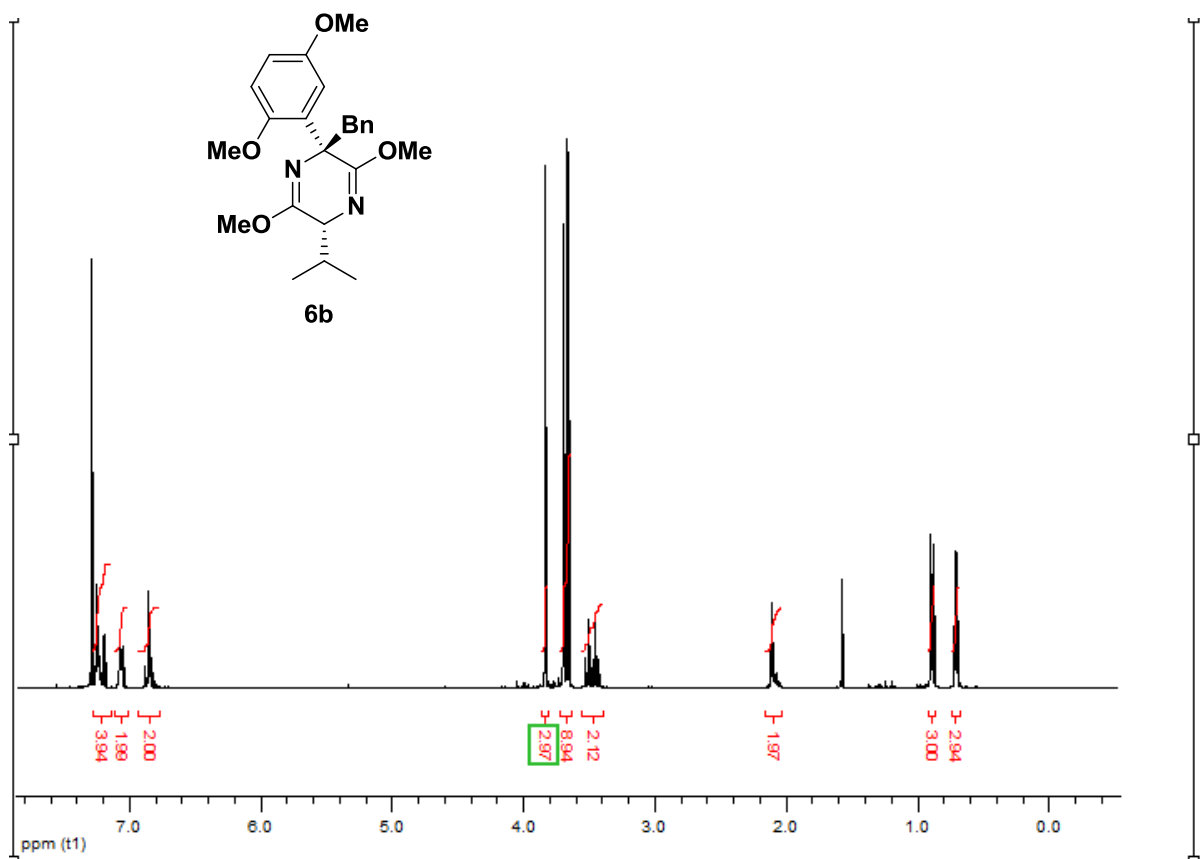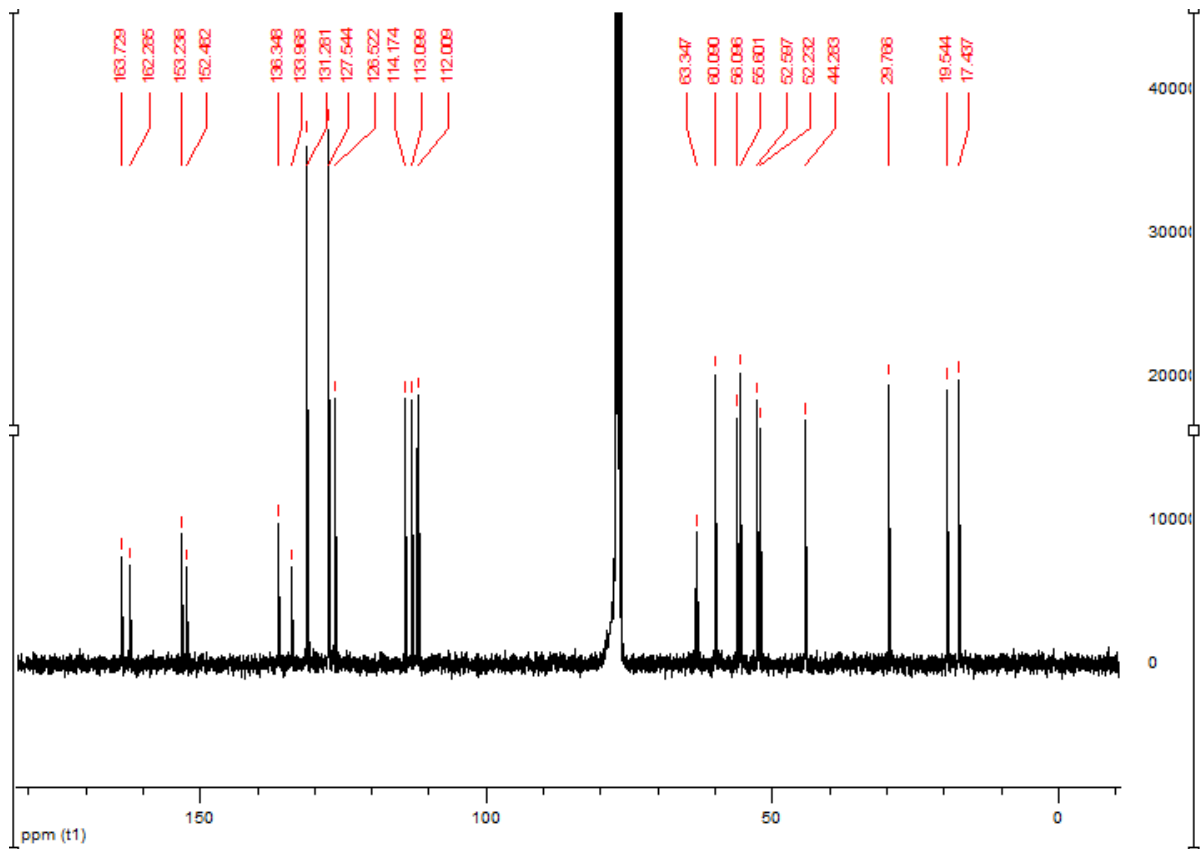

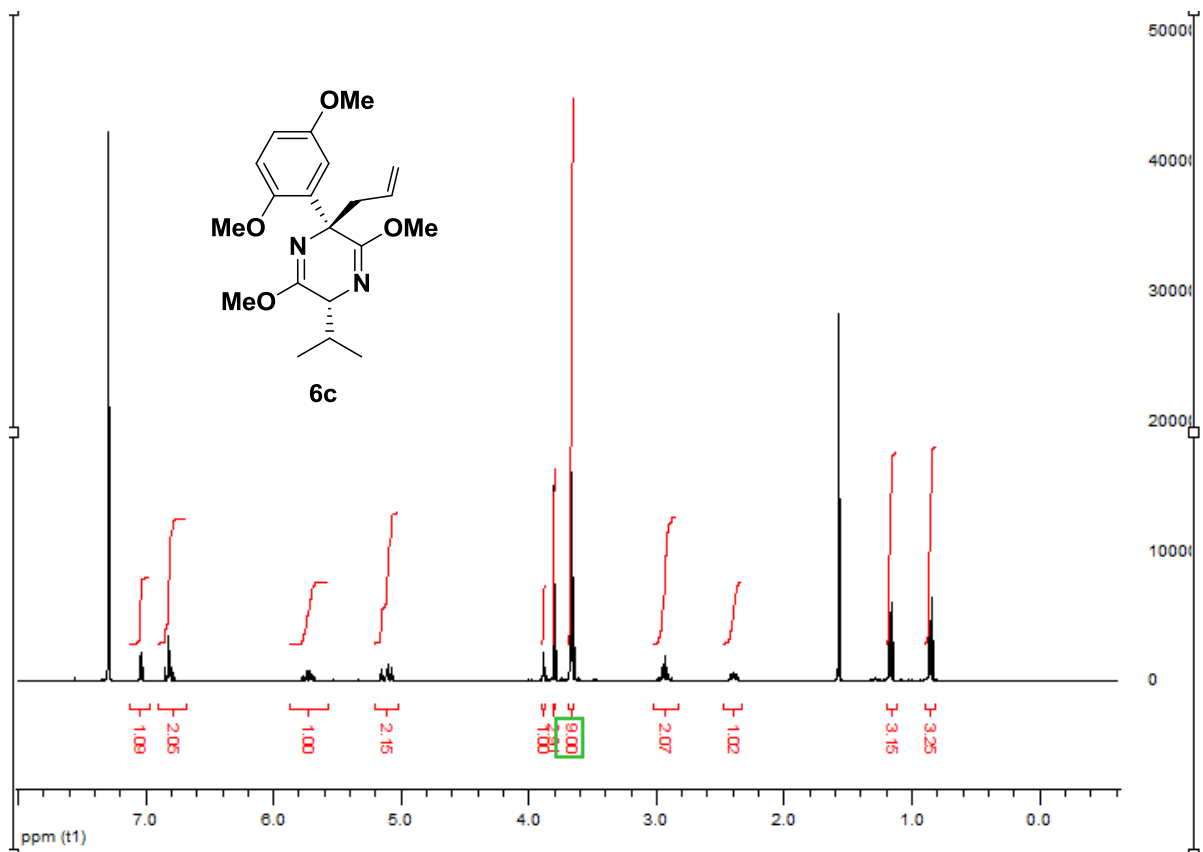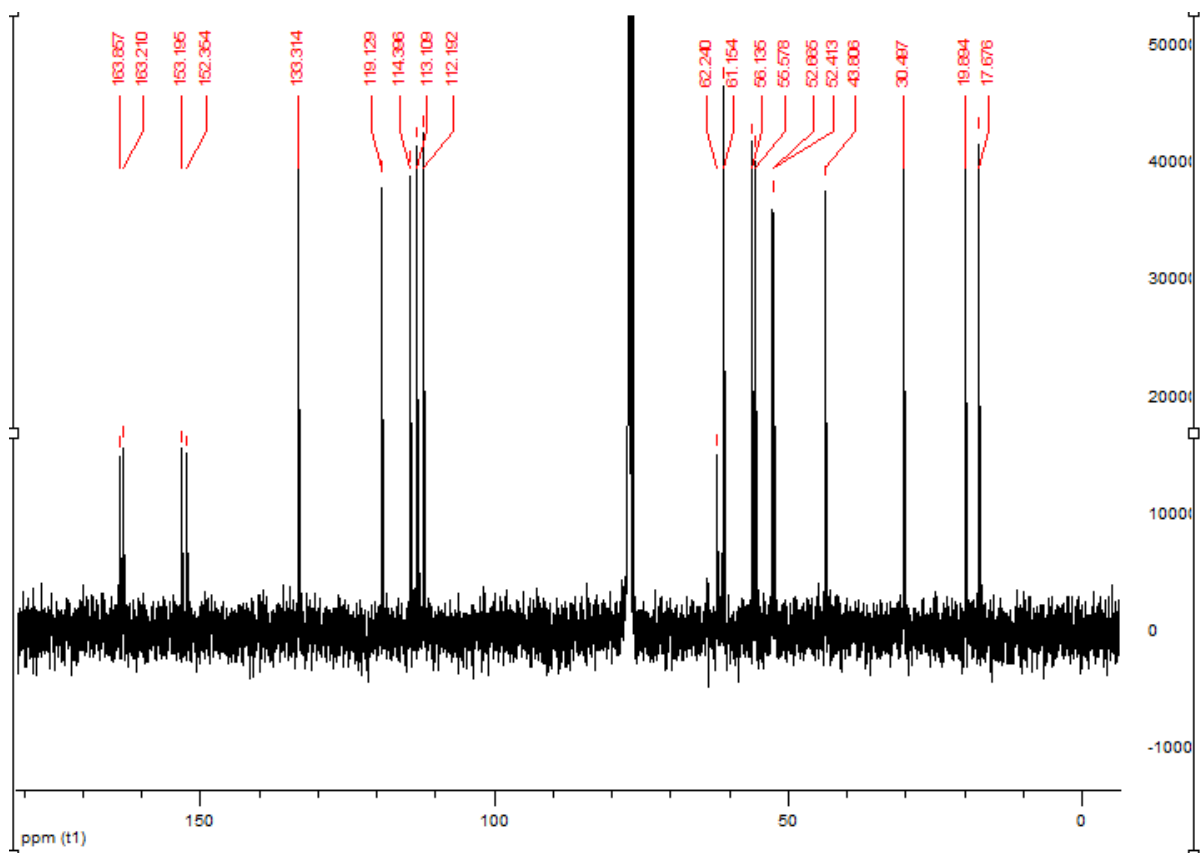

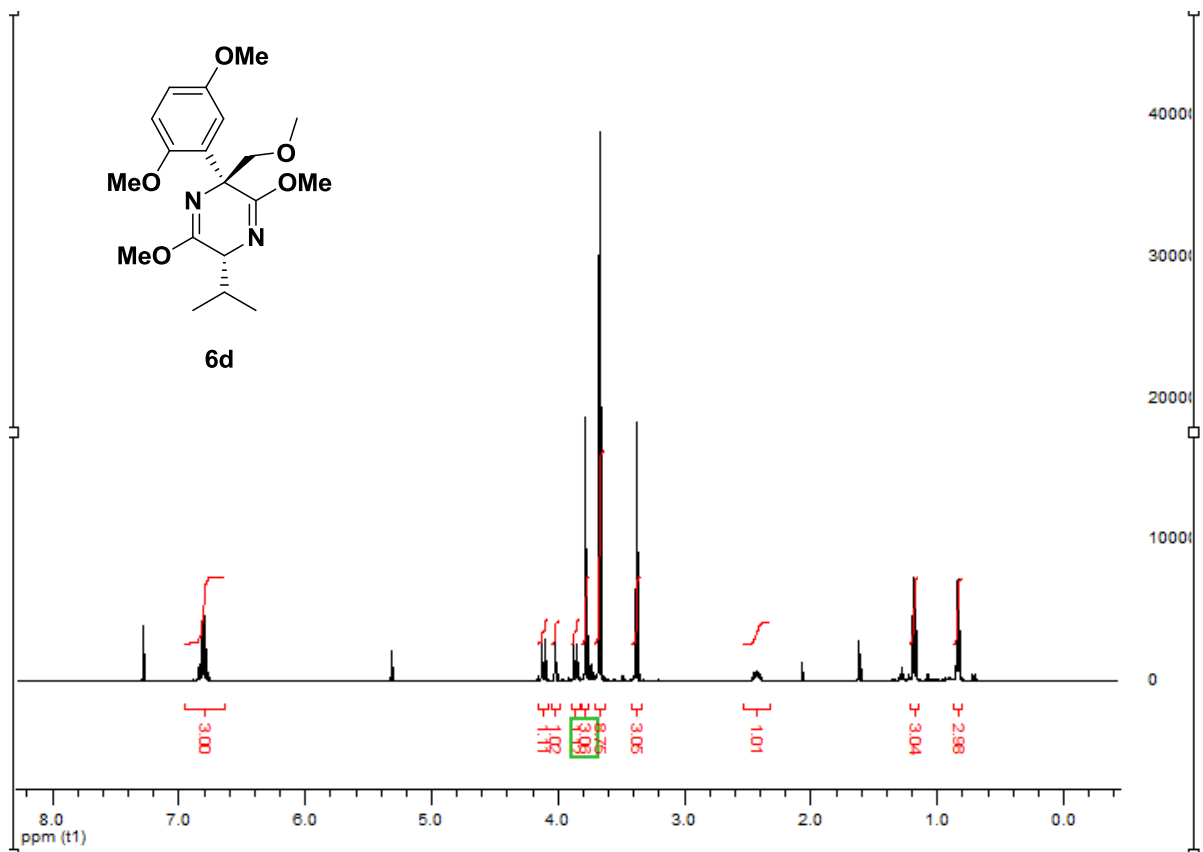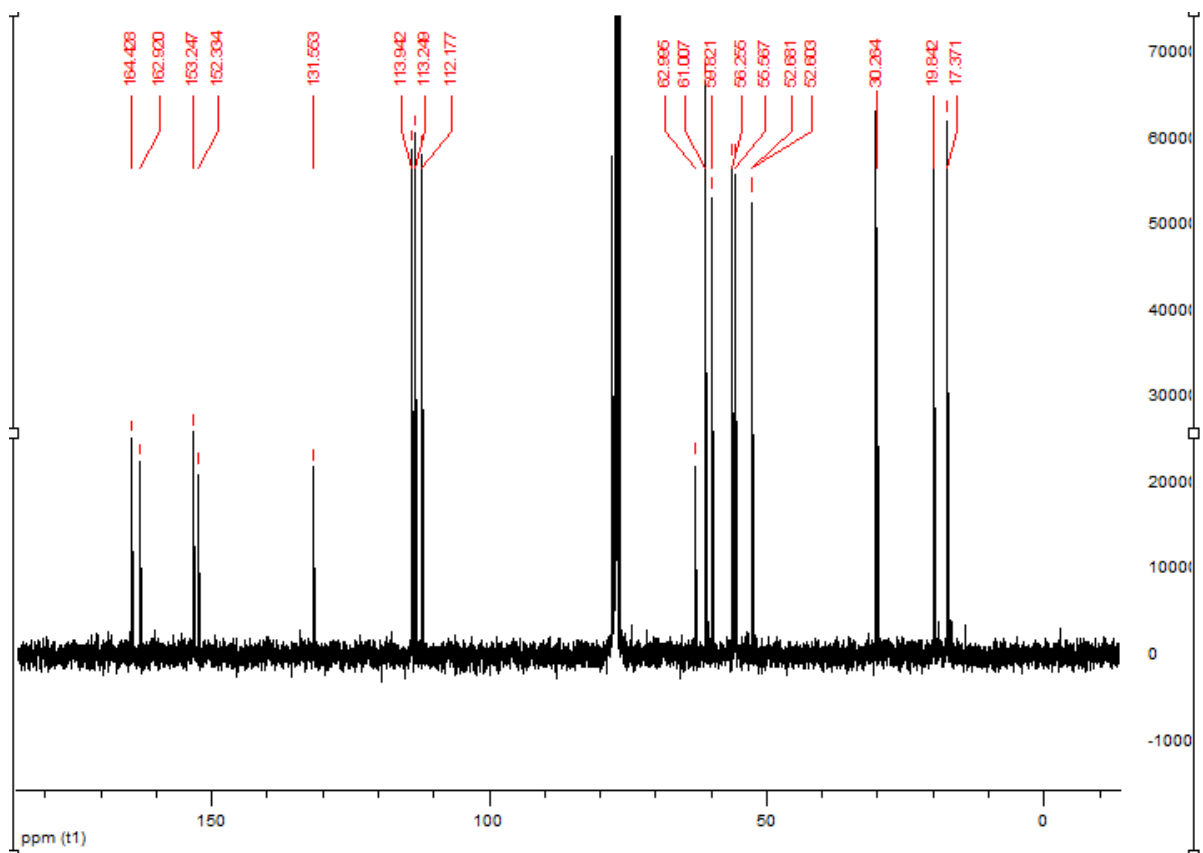

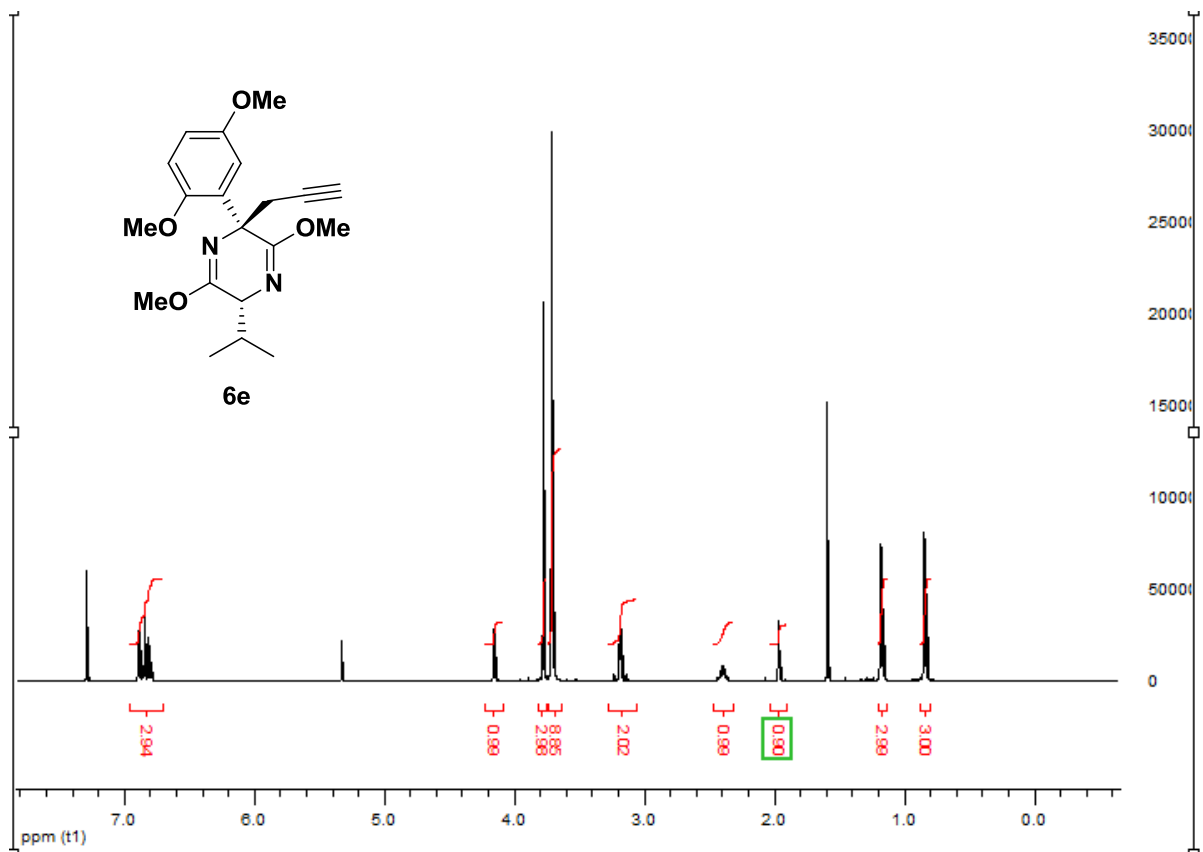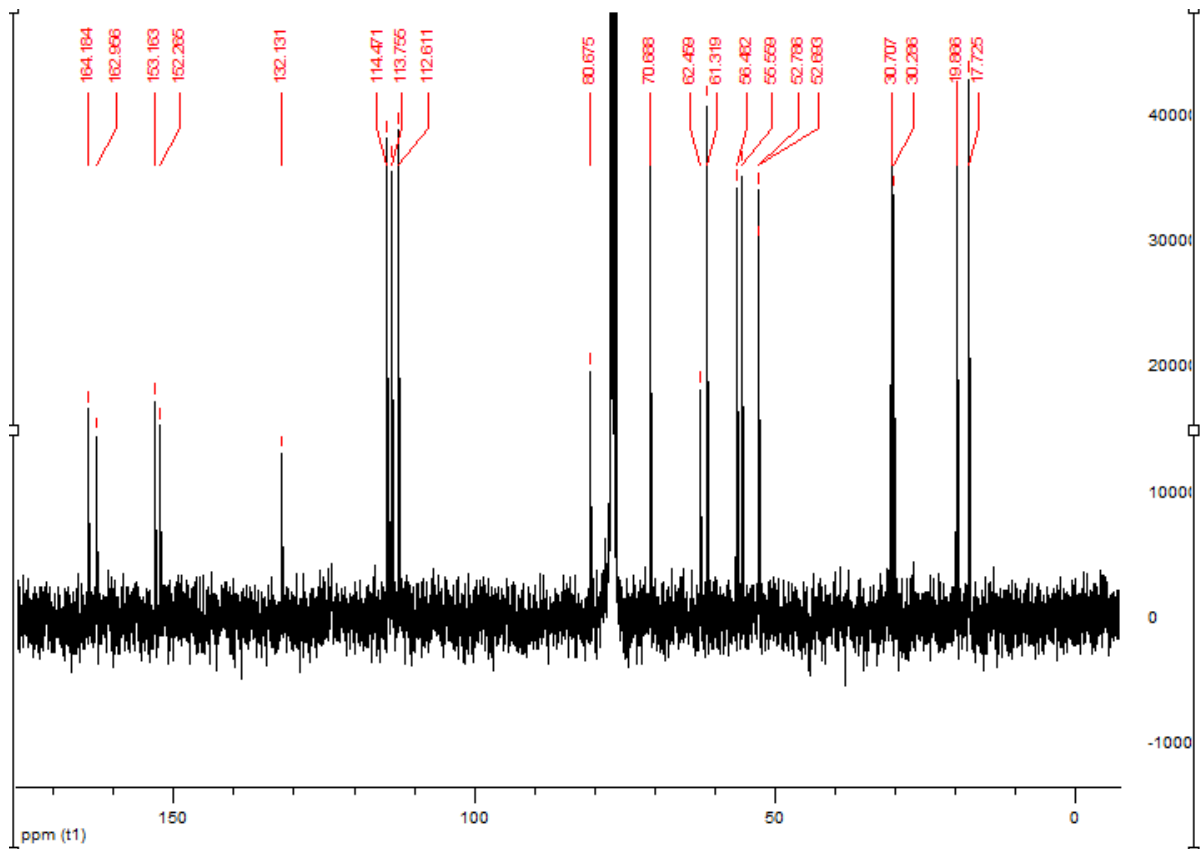

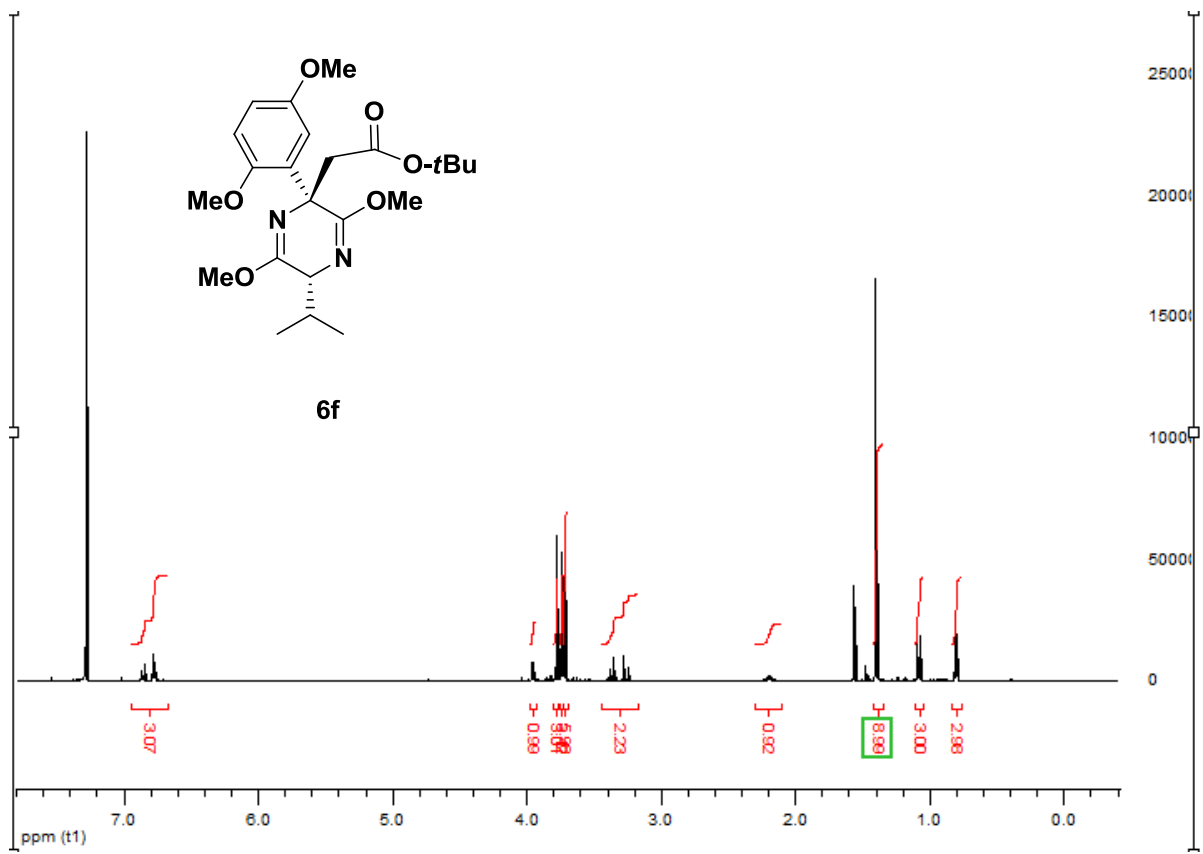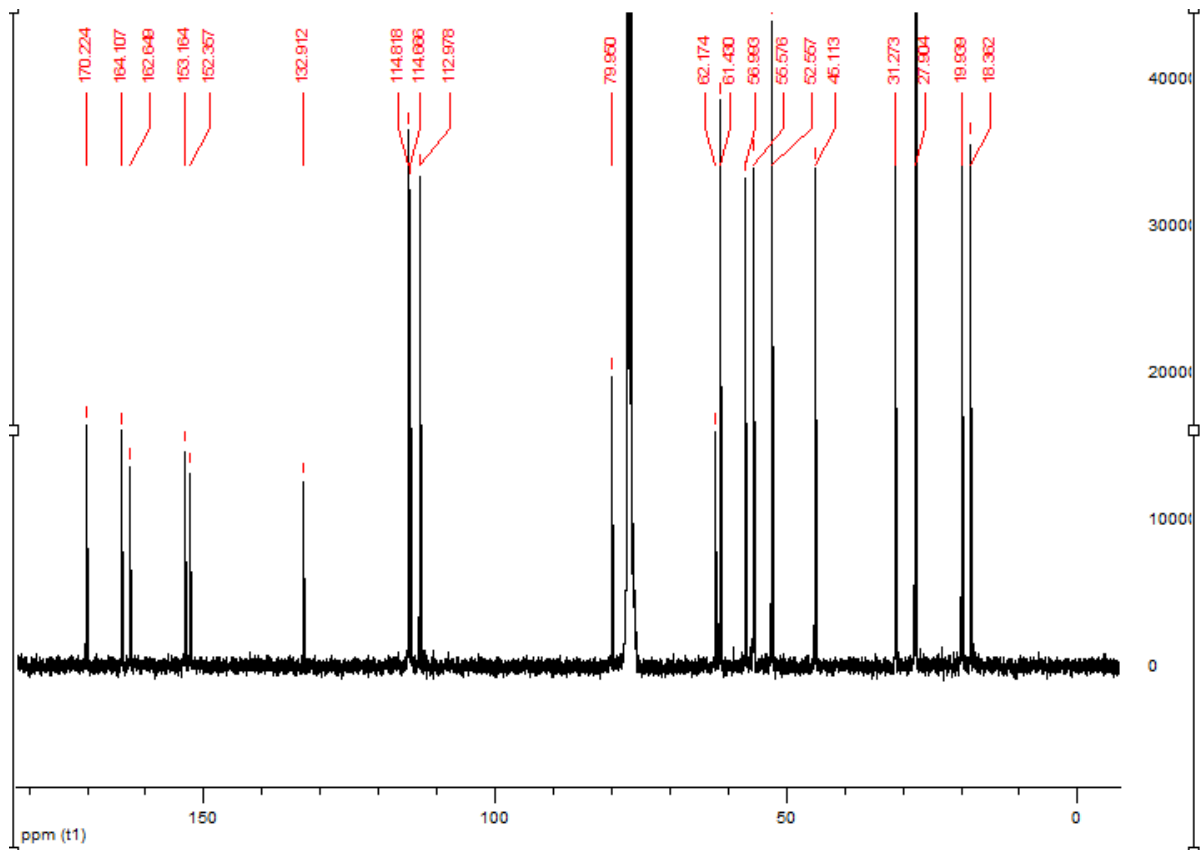

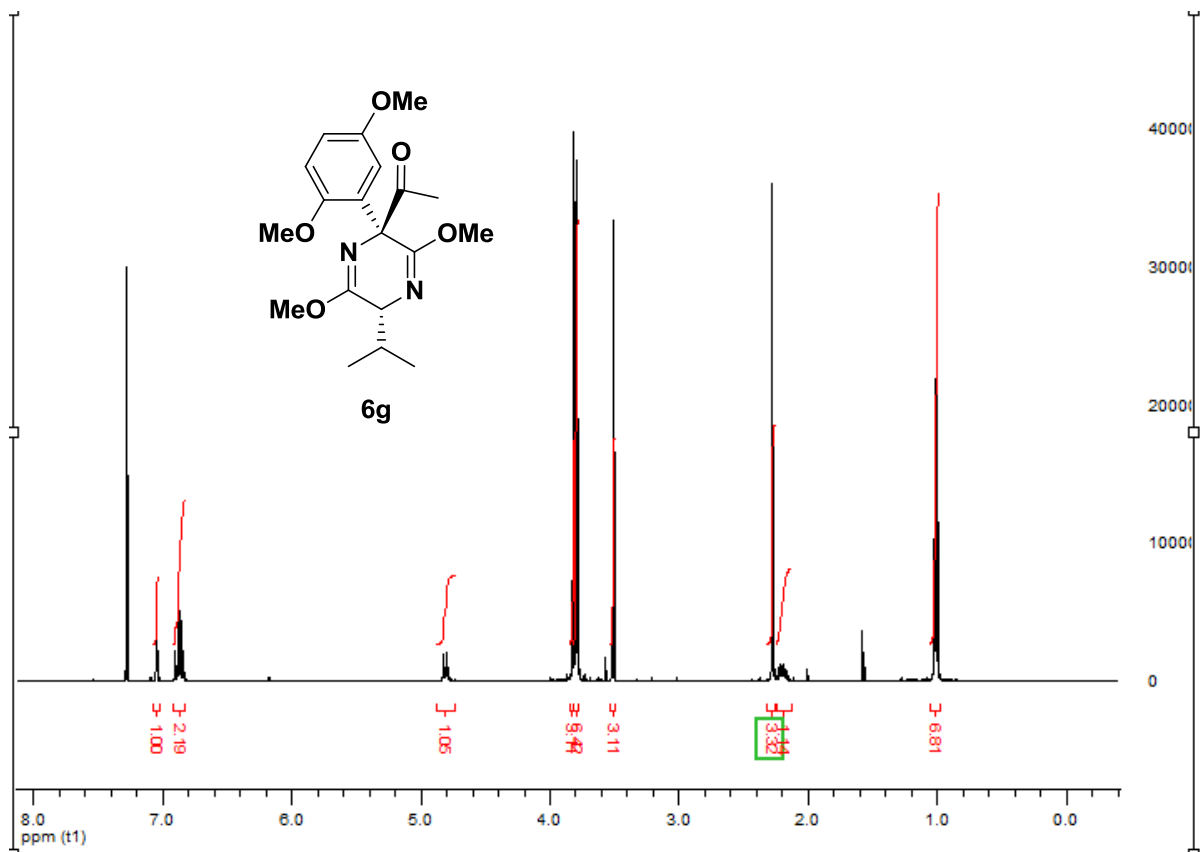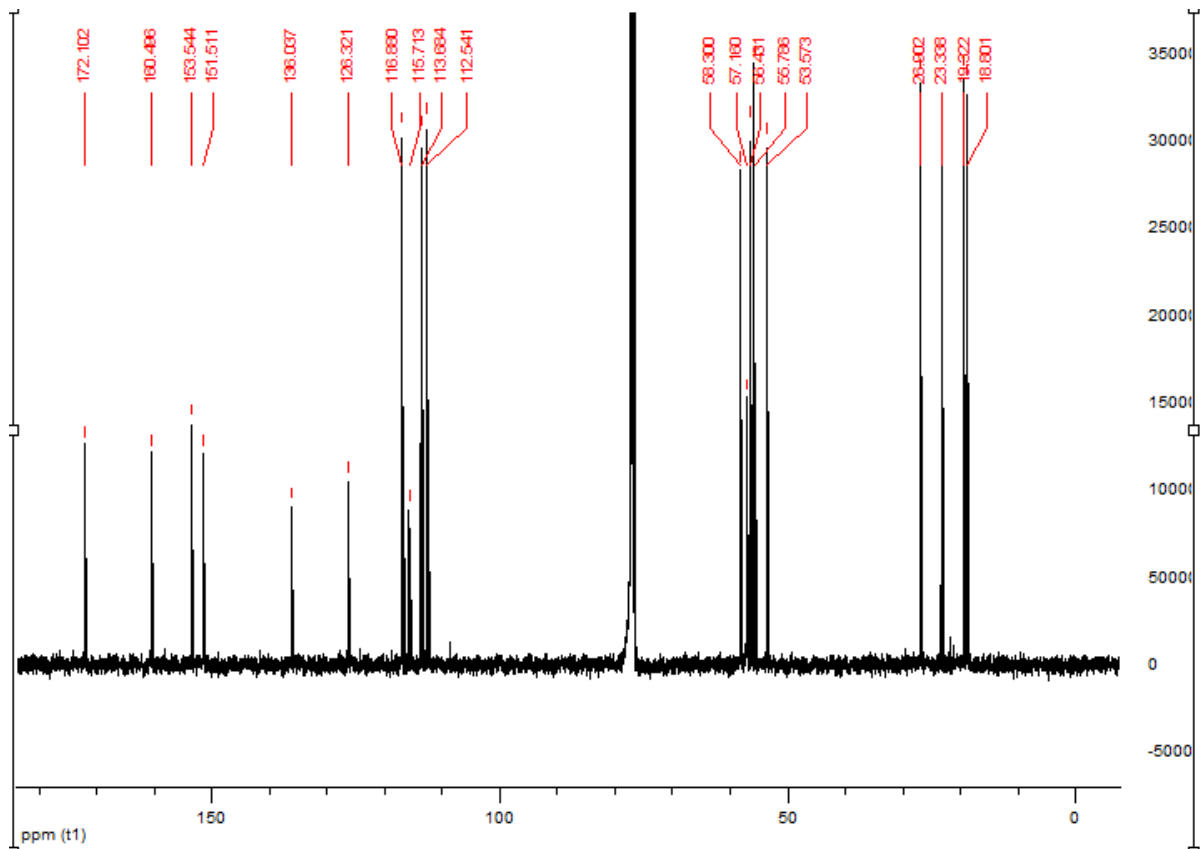



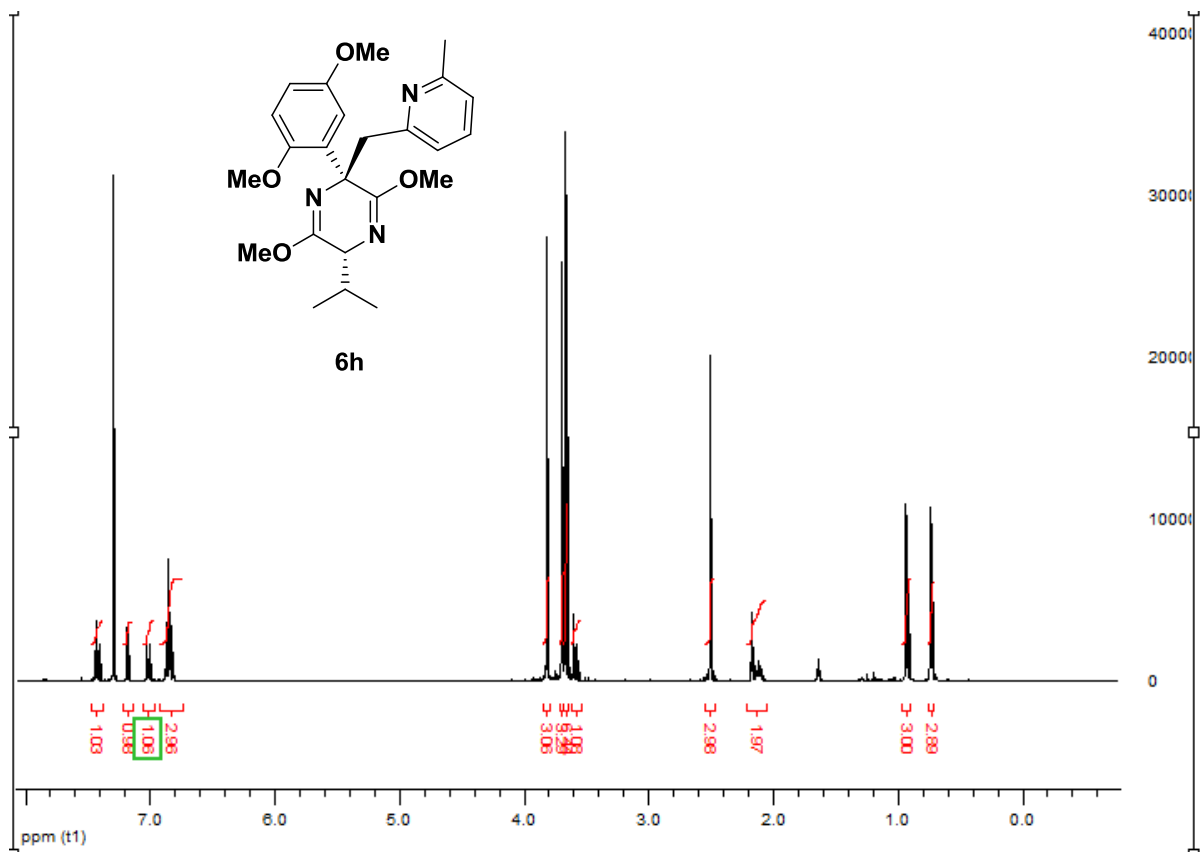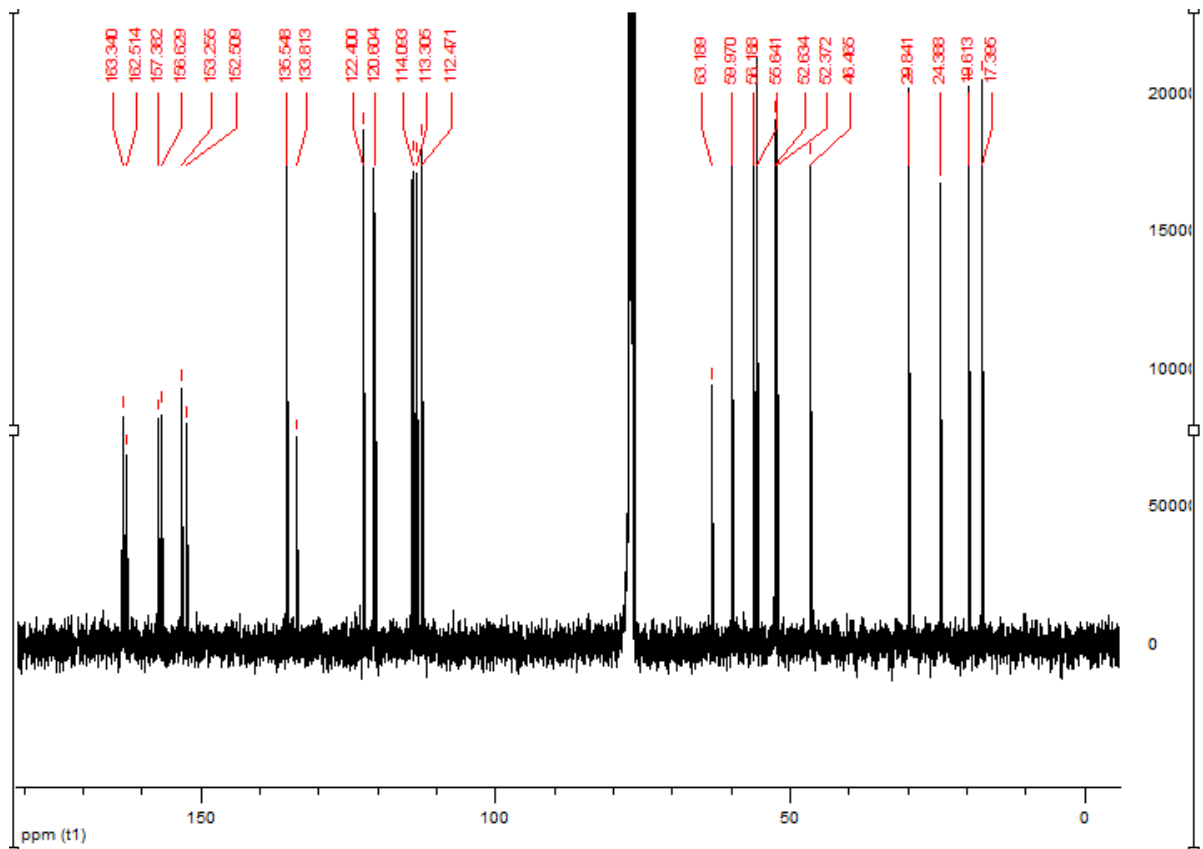

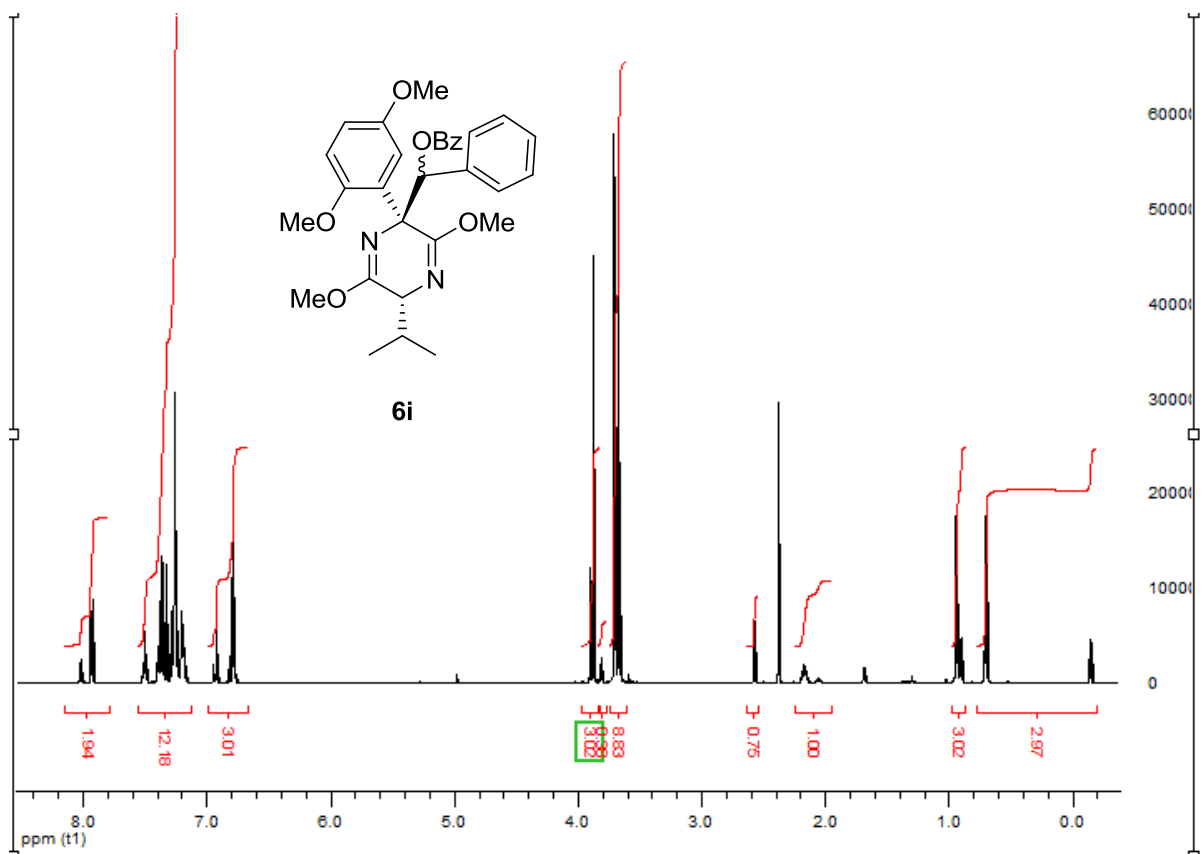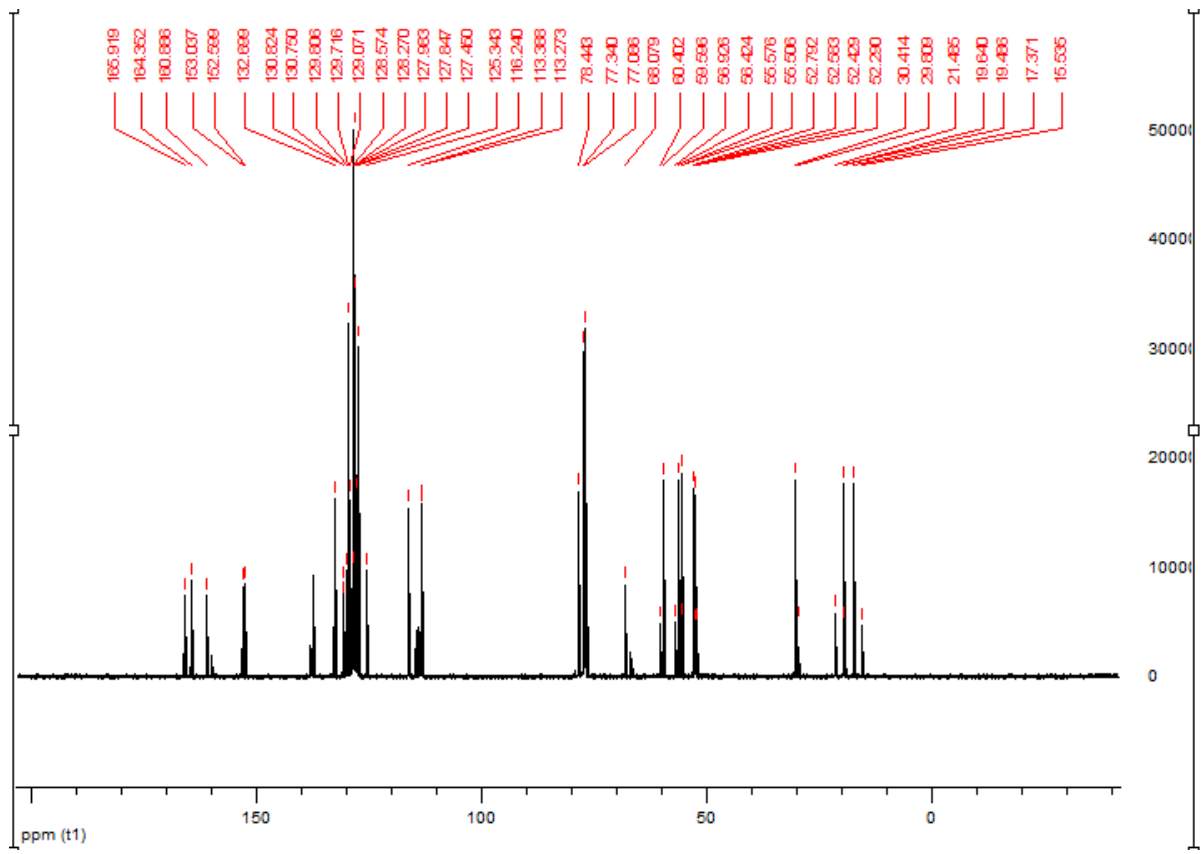

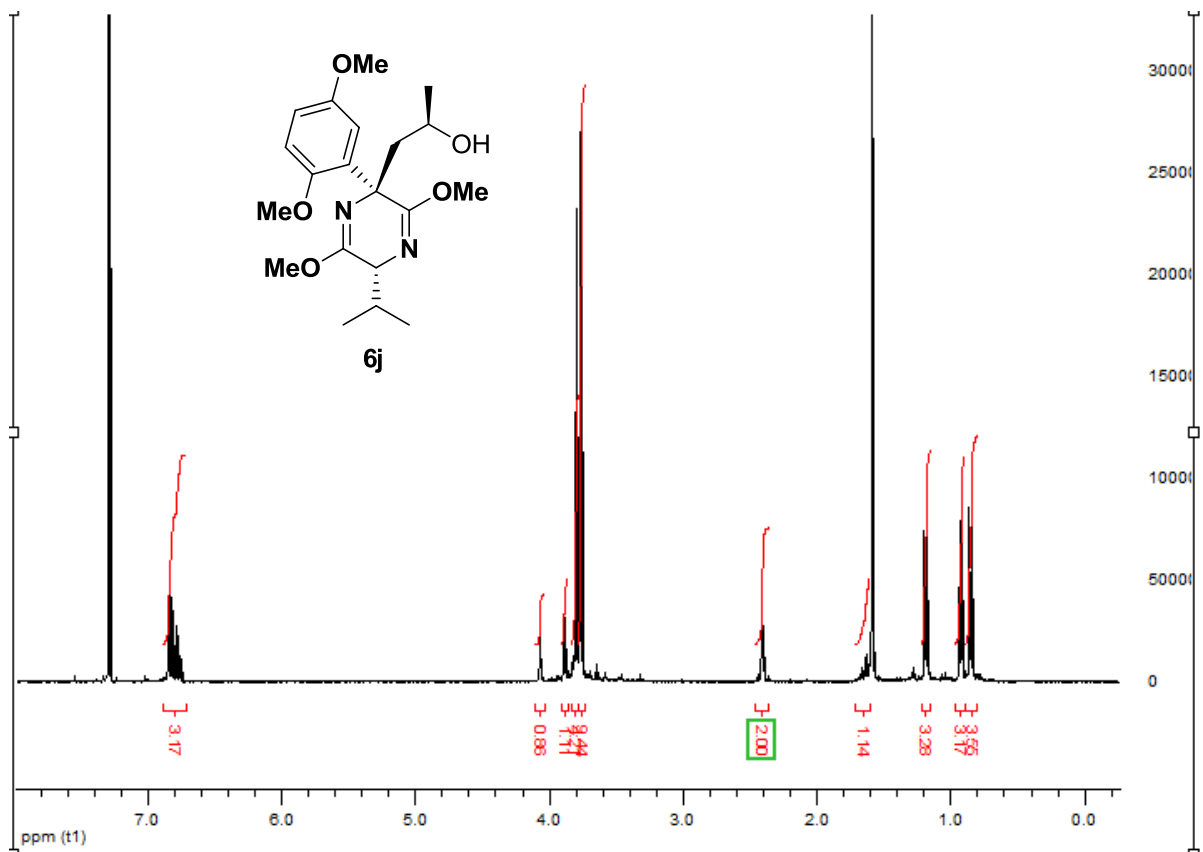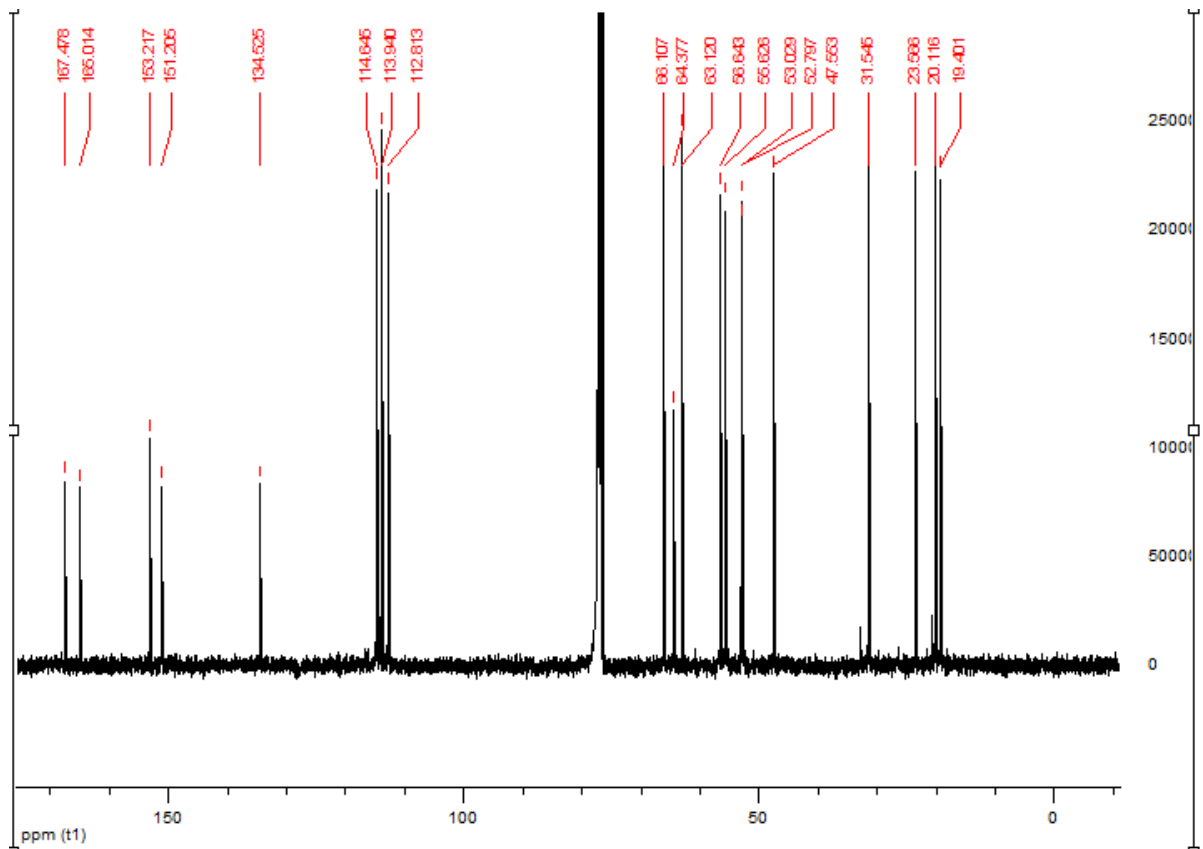

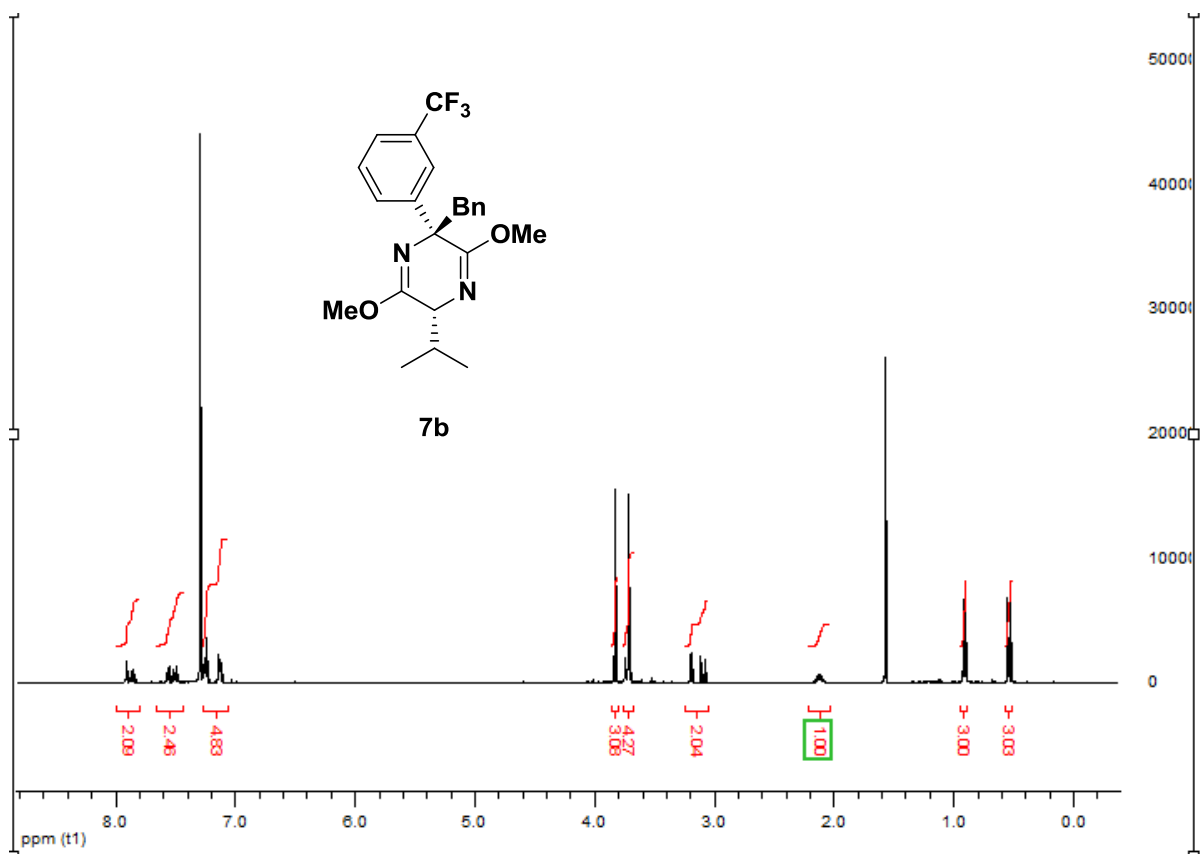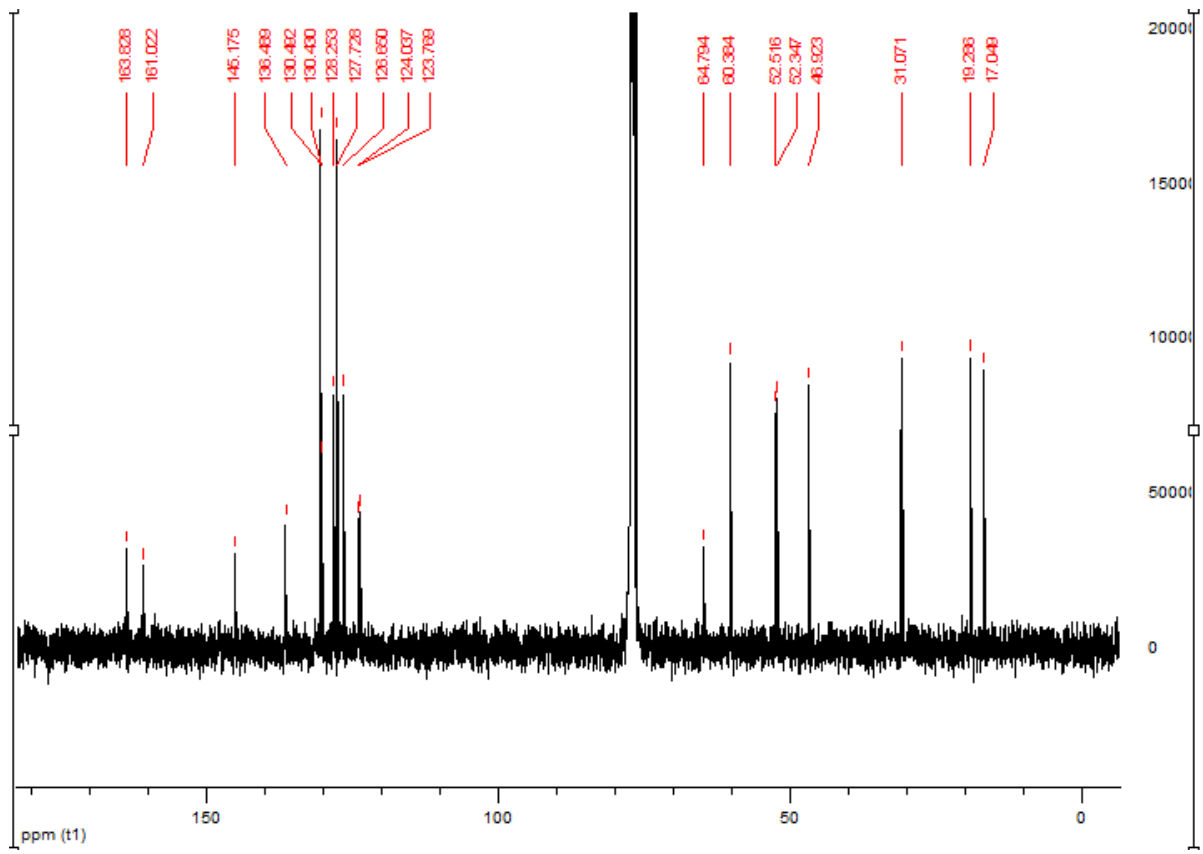

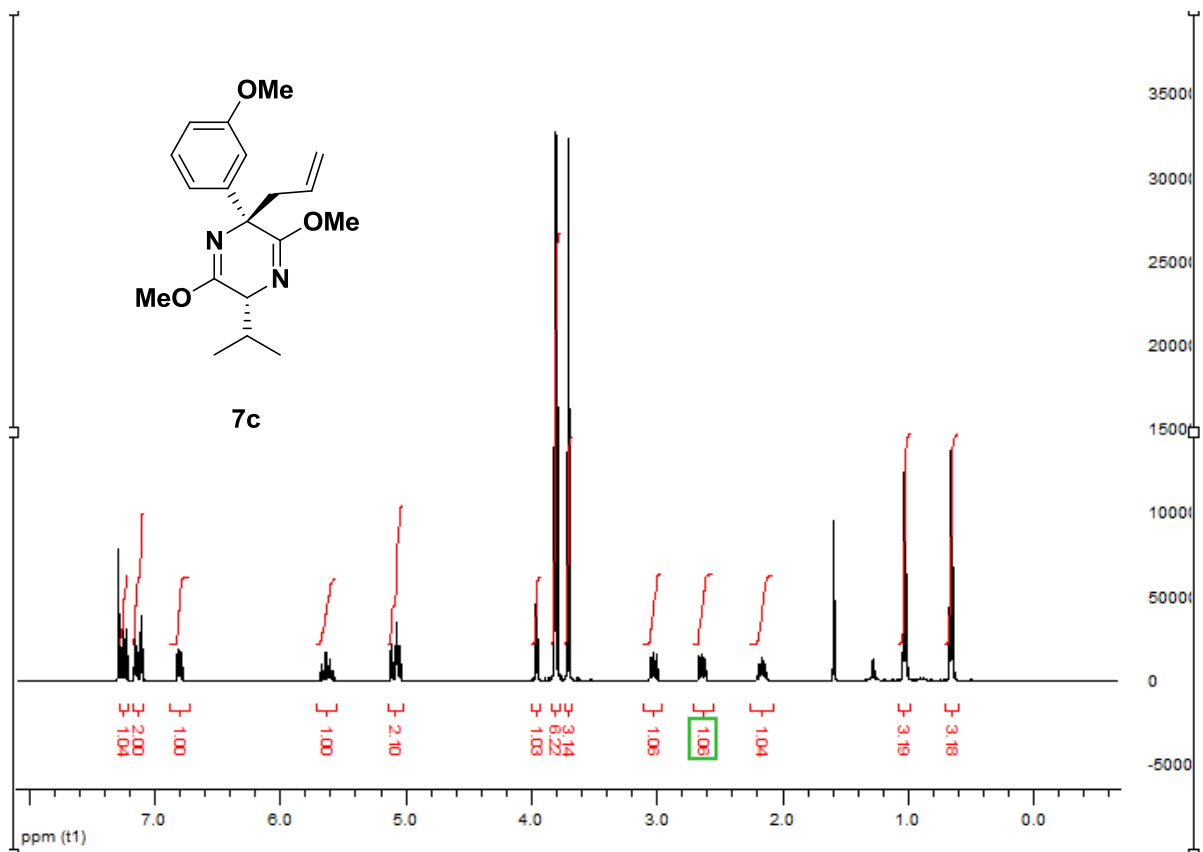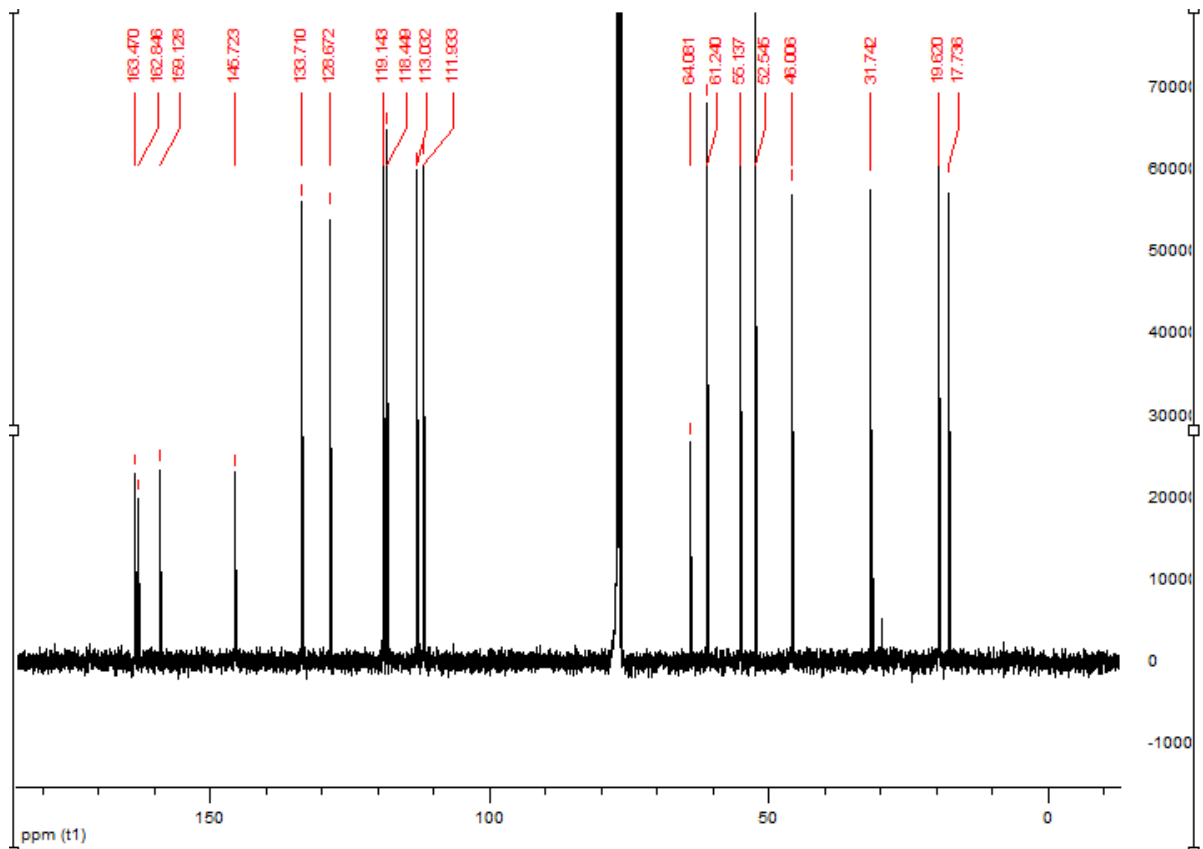

Supplement: Additional file 2 [file 1860-5397-7-185-S2.pdf]
